# Supplementary material for: A printable thermally activated delayed fluorescence polymer light emitting diode
Source: Royal Society of Chemistry journal article supplement (doi:10.1039/d0tc02735a), 2020-01-01
Supplement: d0tc02735a1.pdf [file d0tc02735a1.pdf]

## Supporting Information

### A Printable Thermally Activated Delayed Fluorescent Polymer Light Emitting Diode

*Cameron M. Cole, Susanna V. Kunz, Paul. E. Shaw, Nico-Patrick Thoebes, Thomas Baumann, Eva Blasco, James P. Blinco, Prashant Sonar, Christopher Barner-Kowollik\* and Soniya D. Yambem\**

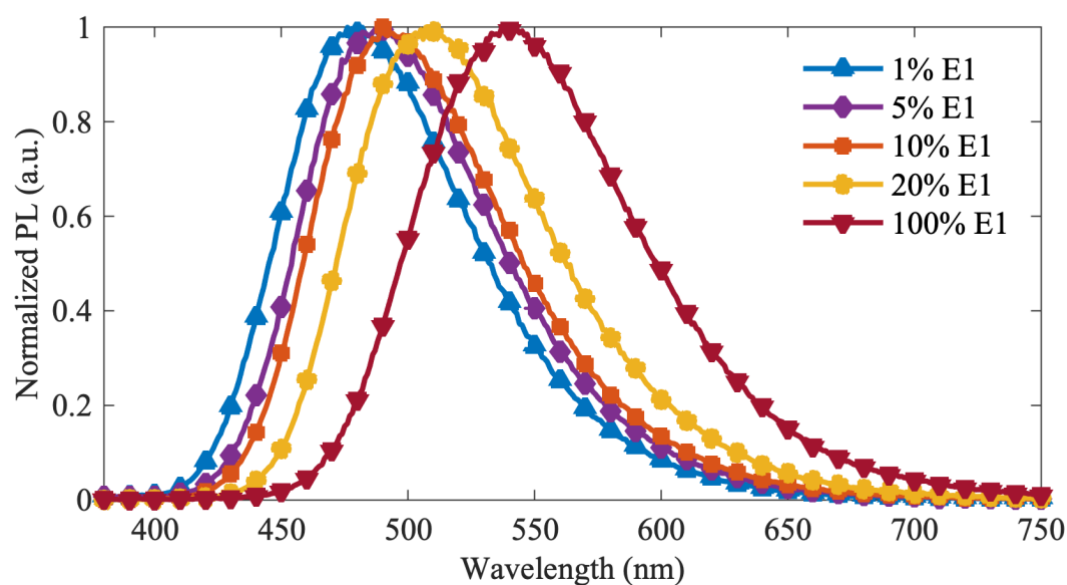

**Figure S1.** Photoluminescence spectra of pure **E1** and **E1**:PMMA with different weight percentages of **E1**.

**Table S2.** Averages and best performance parameters of OLEDs.

|                             | <i>P1 OLED</i>  | <i>P5 OLED</i>  |
|-----------------------------|-----------------|-----------------|
| $L_{MAX}$ ( $cd\ m^{-2}$ )  | 2487            | 4690            |
| $L_{AVG}$ ( $cd\ m^{-2}$ )  | $2087 \pm 262$  | $4219 \pm 357$  |
| $EQE_{MAX}$ (%)             | 0.24            | 1.05            |
| $EQE_{AVG}$ (%)             | $0.22 \pm 0.02$ | $0.54 \pm 0.31$ |
| $CE_{MAX}$ ( $cd\ A^{-1}$ ) | 0.71            | 3.46            |
| $CE_{AVG}$ ( $cd\ A^{-1}$ ) | $0.65 \pm 0.06$ | $1.78 \pm 1.01$ |
| $V_{turn-on-AVG}$ (V)       | $8.12 \pm 0.08$ | $8.1 \pm 0.2$   |

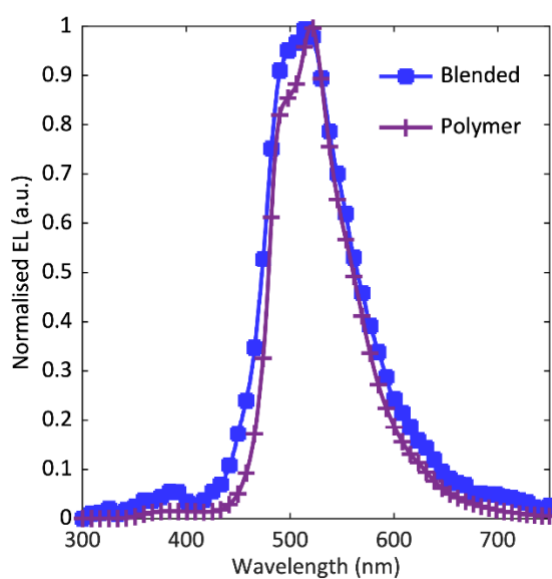

**Figure S3.** Electroluminescence spectra comparison between a blended EML ((**E1**(5mol%):PMMA)(30 wt%):26DCzPPy) and a polymer EML (**P5**(30wt%):26DCzPPy) OLED. The structure of the OLEDs was ITO/PEDOT:PSS/EML/TPBi/Ba/Ag.

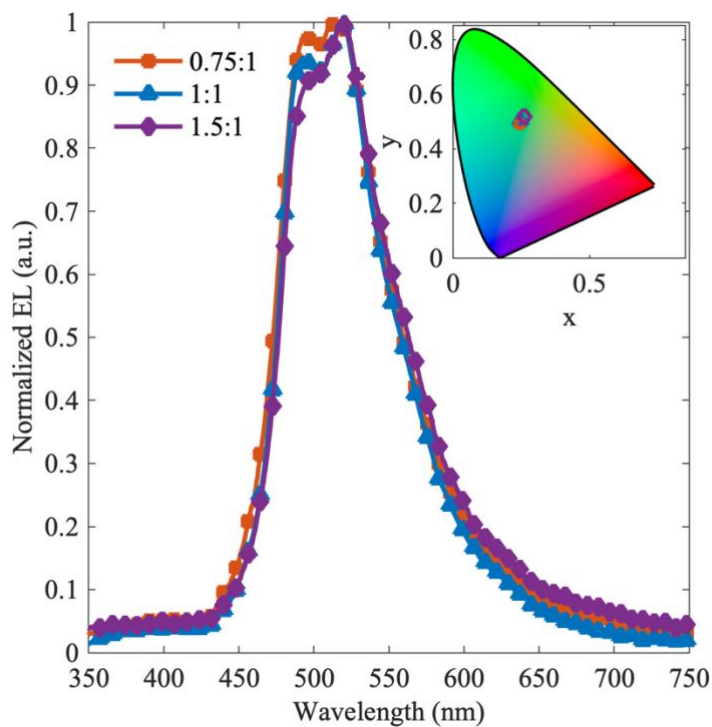

**Figure S4.** Electroluminescence spectra of the standard (**P5**(30wt%):26DCzPPy) OLEDs with different thickness ratios of EML to ETL, whilst keeping the overall device thickness constant. Insert of CIE coordinates (CIE: 0.25, 0.59 for 0.75:1, 0.25, 0.50 for 1:1 and 0.26, 0.56 for 1.5:1).

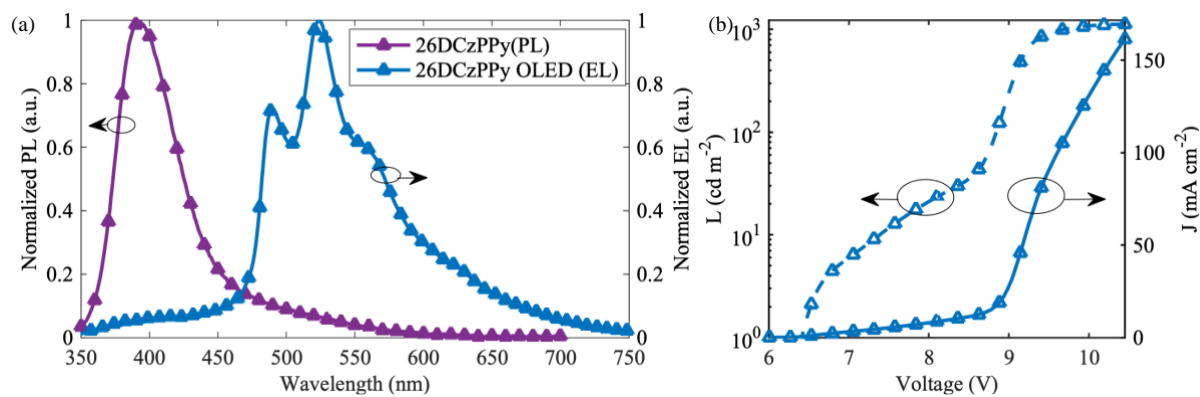

**Figure S5.** (a) Photoluminescence spectrum of 26DCzPPy and electroluminescence spectrum of OLED with structure ITO/PEDOT:PSS/26DCzPPy/TPBi/Ba/Ag (CIE: 0.31, 0.52). (b) Current density and luminance with respect to voltage for ITO/PEDOT:PSS/26DCzPPy/TPBi/Ba/Ag (Emitter-Free) OLED. (Pixel sizes for these OLEDs were 10 mm<sup>2</sup>).

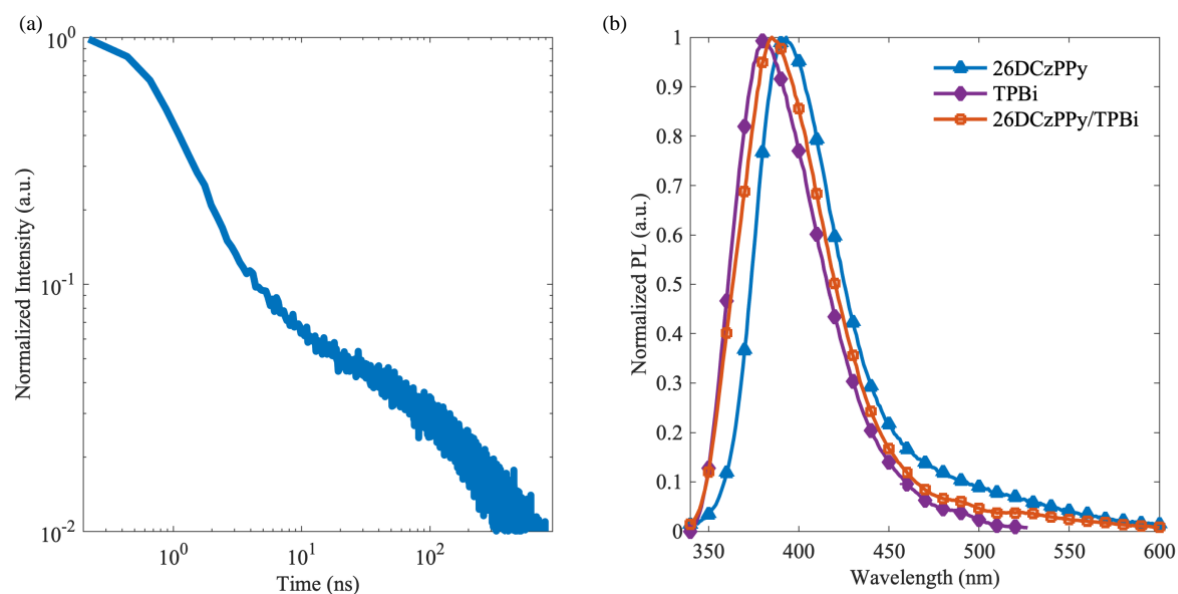

**Figure S6.** (a) Time resolved photoluminescence of TPBi:26DCzPPy, and (b) Photoluminescence of TPBi, 26DCzPPy and a TPBi/26DCzPPy film.

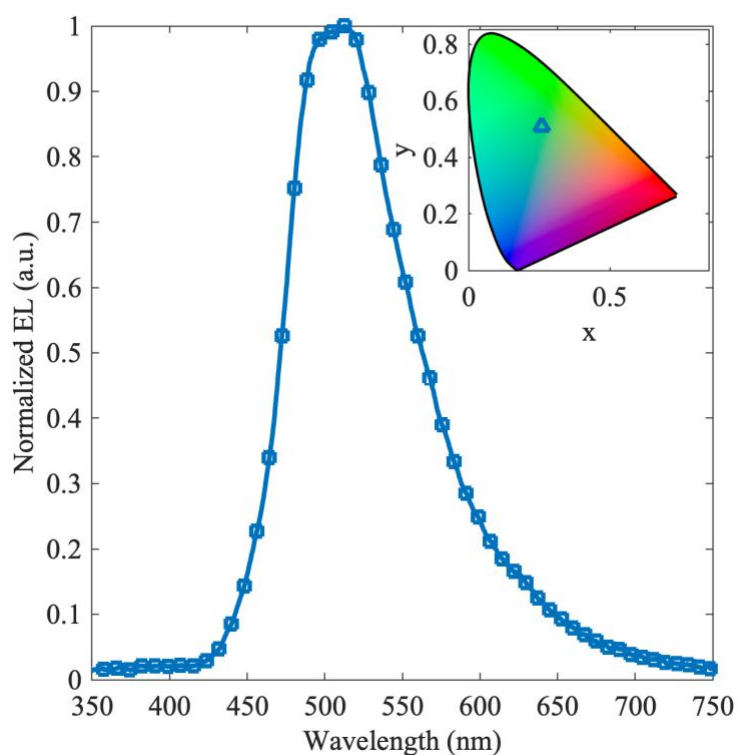

**Figure S7.** Electroluminescence spectrum of a standard OLED (shown in figure 4) without a TPBi layer. Insert of CIE coordinates (CIE: 0.26, 0.48).

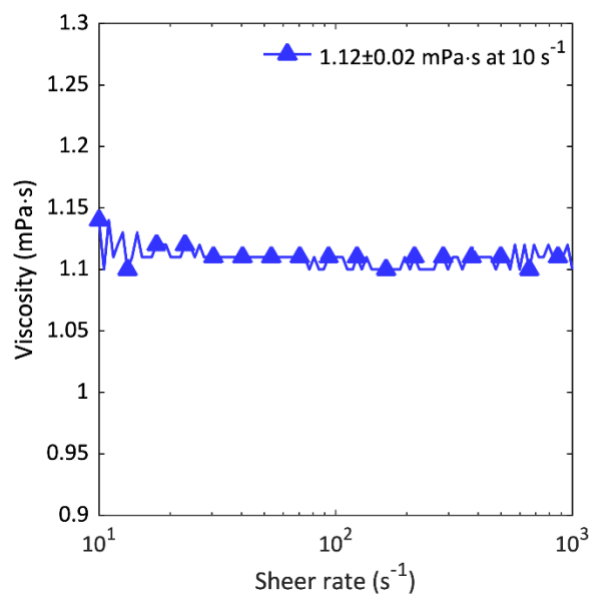

**Figure S8.** Viscosity measurements of **P5**(30%):26DCzPPy in 10 mg mL<sup>-1</sup> of 5 vol% propylene carbonate and 95 vol% anisole.

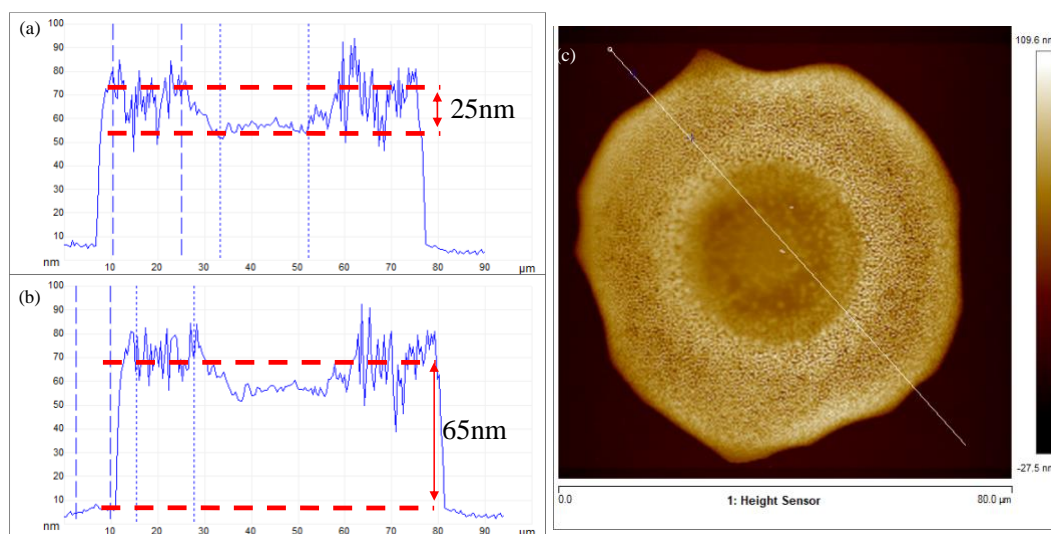

**Figure S9.** Cross-sectional height variation on the printed droplet. (a) Difference in height between edge and mid-section of droplet. (b) Height of the highest part of the droplet. (c) Cross section for the height profile in (a) and (b).

## Photophysical calculations

The equations used to determine the prompt ( $\Phi_{PF}$ ) and delayed fluorescent ( $\Phi_{DF}$ ) yields and the reverse intersystem crossing rate ( $k_{rISC}$ ) used the method shown by Dias, F. B. et al. (2017).<sup>1</sup> Firstly, the TRPL curves were fitted using a triple exponential fit (**Equation (1)**) where the delayed component is determine from the second two components (**Equation (2)**) . From TRPL fitting the  $\Phi_{DF}$  and  $\Phi_{PF}$  components were determined using **Equation (3)**. Using this ratio and the measured  $\Phi_F$ , the values for  $\Phi_{DF}$  and  $\Phi_{PF}$  were found. **Equation (4)** was used to determine the  $k_{rISC}$ .

$$I(t) = A e^{-\frac{1}{\tau_1}(t)} + B e^{-\frac{1}{\tau_2}(t)} + C e^{-\frac{1}{\tau_3}(t)} \quad (1)$$

$$\tau_{DF} = \frac{B\tau_2^2 + C\tau_3^2}{B\tau_2 + C\tau_2} \quad (2)$$

$$\frac{\Phi_{DF}}{\Phi_{PF}} = \frac{B\tau_2 + C\tau_2}{A\tau_1} \quad (3)$$

$$\kappa_{rISC} = \frac{1}{\tau_{DF}} \left( \frac{\Phi_{PF} + \Phi_{DF}}{\Phi_{PF}} \right) \quad (4)$$

## Polymer synthesis

The polymer was synthesized in a free radical polymerization of MMA and the emitter methacrylate monomer in a feed ratio of 95:5 using azobisisobutyronitrile (AIBN) as a thermally decomposing radical initiator. The content of the emitter in the final building block was confirmed by <sup>1</sup>H-NMR spectroscopy.

**P5:**

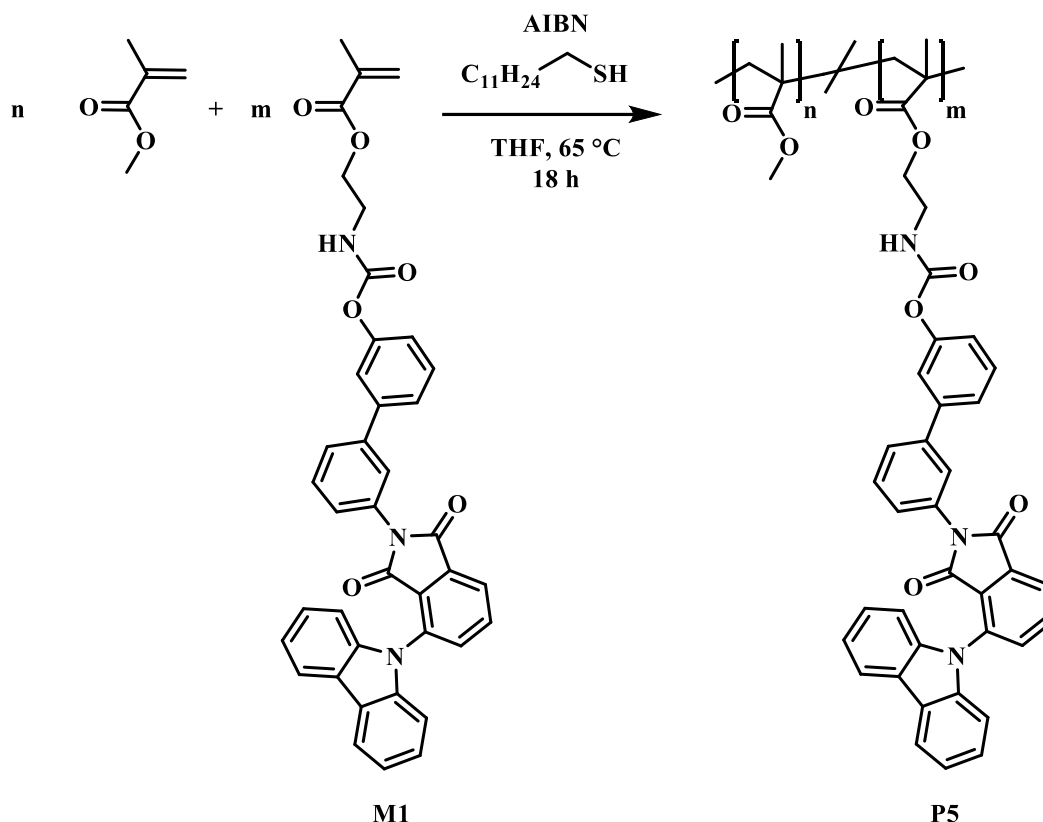

The emitter methacrylate monomer **M1** was synthesized as reported in the literature.<sup>2</sup>

Methyl methacrylate and THF were passed over basic alumina prior to utilization. The emitter methacrylate monomer **M1** (96.7 mg, 0.15 mmol, 5 eq.) and AIBN (5.0 mg, 0.03 mmol, 1 eq.) were carefully weighed in a dry headspace vial. Methyl methacrylate (308  $\mu\text{L}$ , 289.6 mg, 2.9 mmol, 95 eq.), dodecane-1-thiol (7.3  $\mu\text{L}$ , 6.2 mg, 0.03 mmol, 1 eq.) and THF (2 mL) were added, the vial sealed airtight and degassed by purging with argon for 5 min. The polymerization mixture was then placed in a preheated oil bath and stirred at 65  $^\circ\text{C}$  for 18 h. The polymerization was quenched by opening to oxygen and cooling the mixture to -18  $^\circ\text{C}$ . Afterwards, the polymer was precipitated in ice-cold methanol (10% water). After filtration the yellow powder was dried in vacuo (yield: 380 mg, 95%).

SEC (THF):  $M_n = 6\,800\text{ g mol}^{-1}$ ,  $M_w = 11\,100\text{ g mol}^{-1}$ ,  $\bar{D} = 1.62$  (p(MMA) calibration)

$^1\text{H-NMR}$  (400 MHz,  $\text{CD}_2\text{Cl}_2$ )  $\delta$  [ppm] = 8.21-8.15 (m, 2H, Ar-H), 8.15 – 8.11 (m, 1H, Ar-H), 8.09 – 8.03 (m, 1H, Ar-H), 8.00– 7.95 (m, 1H, Ar-H), 7.66 -7.58 (m, 2H, Ar-H), 7.57 - 7.51 (m, 1H, Ar-H), 7.48 – 7.29 (m, 8H, Ar-H), 7.27 - 7.21 (m, 2H, Ar-H), 7.17 - 7.09 (m, 1H, Ar-H), 4.19 - 4.02 (m, 2H,  $\text{CH}_2\text{-O}$ ), 3.58 (m, 66H,  $\text{CH}_3\text{-O p(MMA)}$ ), 2.53 – 2.40 (m, 2H,  $\text{CH}_2$ ), 2.06 - 1.75 (m, 38H,  $\text{CH}_3$  p(MMA)), 1.08 - 1.53 (m, 20H, p(MMA)), 0.99 (s, 23H, p(MMA)), 0.92 – 0.64 (m, 40H, p(MMA)).

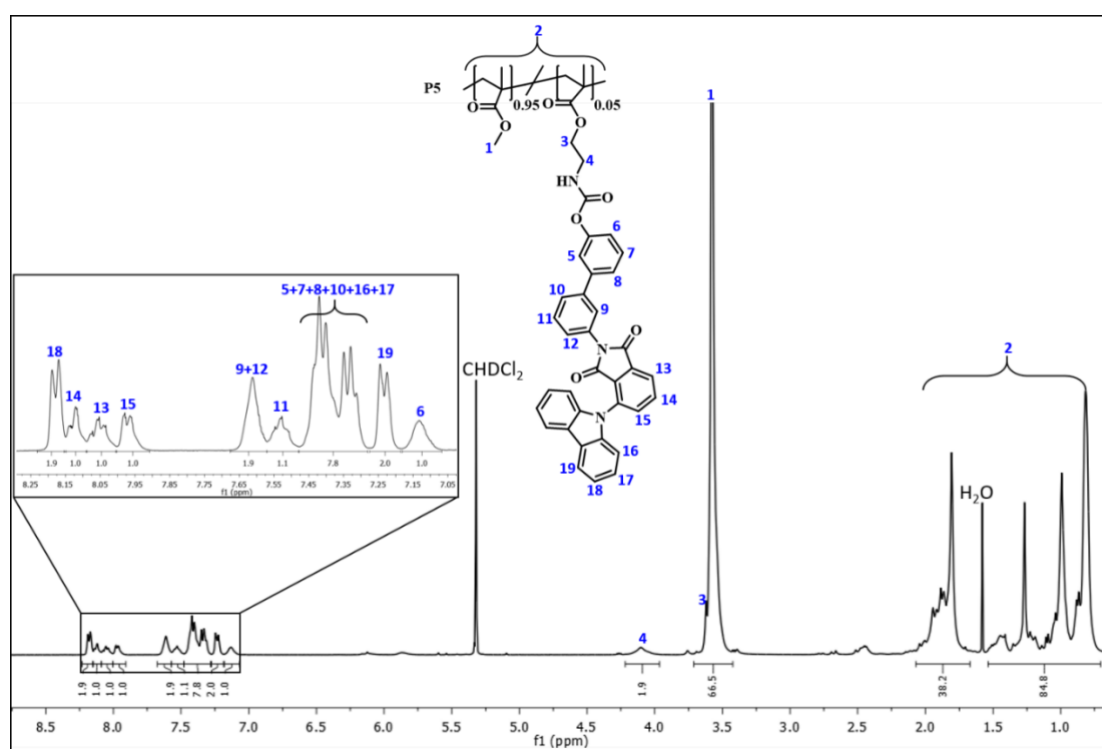

**Figure S10.**  $^1\text{H-NMR}$  spectrum of **P5** in  $\text{CD}_2\text{Cl}_2$ .

#### **P1:**

Methyl methacrylate and THF were passed over basic alumina prior to utilization. The emitter methacrylate monomer **M1** (19.3 mg, 0.03 mmol, 1 eq.) and AIBN (5.0 mg, 0.03 mmol, 1 eq.) were carefully weighed in a dry headspace vial. Methyl methacrylate (321  $\mu\text{L}$ , 301.8 mg, 3.0 mmol, 99 eq.), dodecane-1-thiol (7.3  $\mu\text{L}$ , 6.2 mg, 0.03 mmol, 1 eq.) and THF (2 mL) were added, the vial sealed airtight and degassed by purging with argon for 5 min. The



polymerization mixture was then placed in a preheated oil bath and stirred at 65 °C for 18 h. The polymerization was quenched by opening to oxygen and cooling the mixture to -18 °C. Afterwards, the polymer was precipitated in ice-cold methanol (10% water). After filtration the yellow powder was dried in vacuo (307 mg, yield: 92%).

SEC (THF):  $M_n = 10\,200\text{ g mol}^{-1}$ ,  $M_w = 16\,300\text{ g mol}^{-1}$ ,  $D = 1.60$  (p(MMA) calibration)

$^1\text{H-NMR}$  (400 MHz,  $\text{CD}_2\text{Cl}_2$ )  $\delta$  [ppm] = 8.21-8.15 (m, 2H, Ar-H), 8.15 – 8.11 (m, 1H, Ar-H), 8.09 – 8.03 (m, 1H, Ar-H), 8.00– 7.95 (m, 1H, Ar-H), 7.66 -7.58 (m, 2H, Ar-H), 7.57 - 7.51 (m, 1H, Ar-H), 7.48 – 7.29 (m, 8H, Ar-H), 7.27 - 7.21 (m, 2H, Ar-H), 7.17 - 7.09 (m, 1H, Ar-H), 4.19 - 4.02 (m, 2H,  $\text{CH}_2\text{-O}$ ), 3.58 (m, 302H,  $\text{CH}_3\text{-O p(MMA)}$ ), 2.53 – 2.40 (m, 5H,  $\text{CH}_2$ ), 2.06 - 1.75 (m, 177H,  $\text{CH}_3\text{ p(MMA)}$ ), 1.08 - 1.53 (m, 64H, p(MMA)), 0.99 (s, 103H, p(MMA)), 0.92 – 0.64 (m, 186H, p(MMA)).

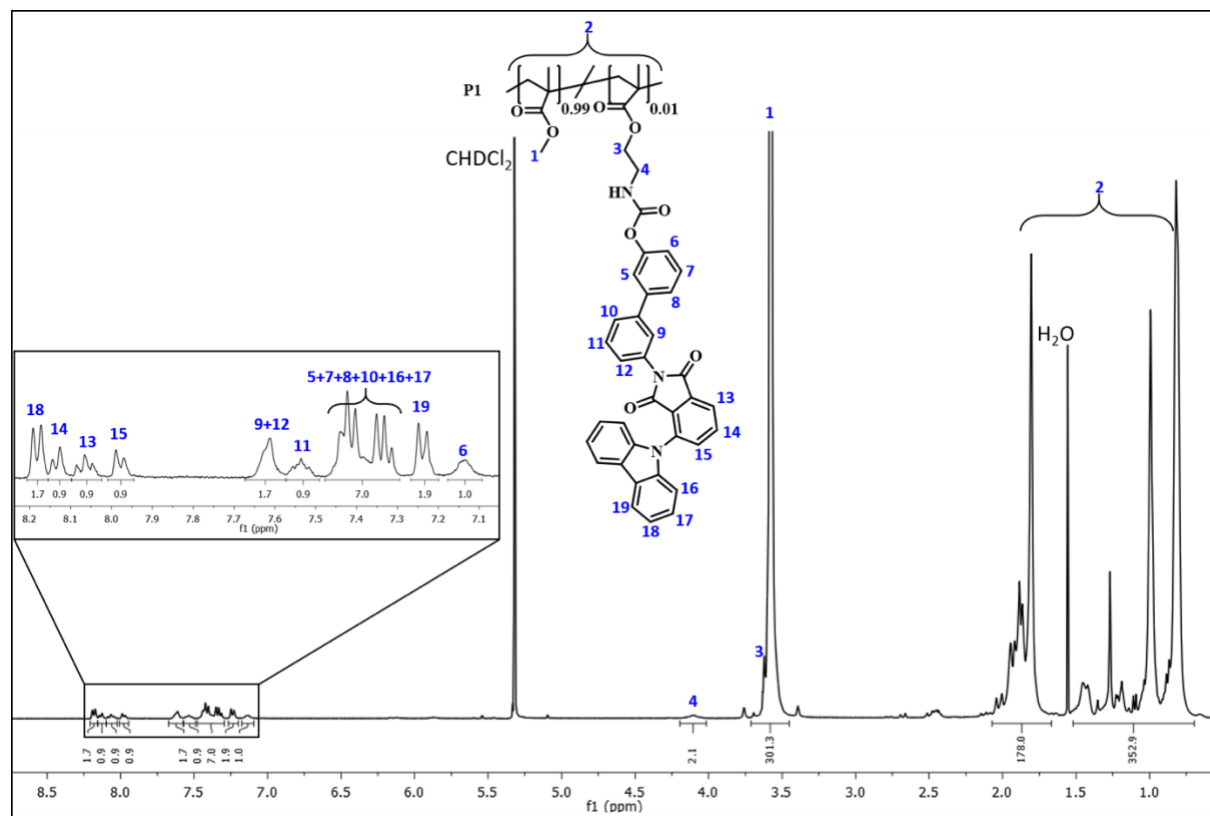

**Figure S11.**  $^1\text{H-NMR}$  spectrum of **P1** in  $\text{CD}_2\text{Cl}_2$ .

The content of the emitter building block in the polymer was calculated from the  $^1\text{H}$ -NMR resonances of the emitter at 7.17 - 7.09 ppm (1 H) and the methoxy group of p(MMA) at 3.58 ppm (3 H).

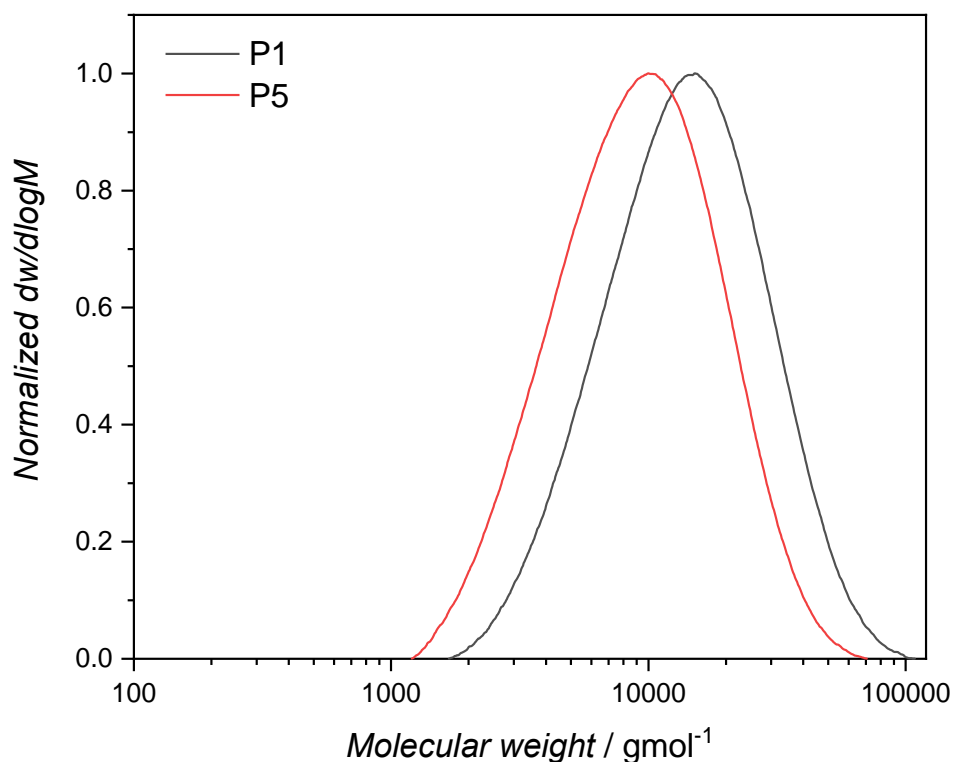

**Figure S12.** Polymer synthesis Molecular weight distribution determined by size exclusion chromatography in THF of **P1** (black) and **P5** (red).

## References

- 1 F. B. Dias, T. J. Penfold and A. P. Monkman, *Methods Appl. Fluoresc.* **2017**, 5, 012001
- 2 S. V. Kunz, C. M. Cole, A. Welle, P. E. Shaw, P. Sonar, N. P. Thoebes, T. Baumann, S. D. Yambem, E. Blasco, J. P. Blinco and C. Barner-Kowollik, *Macromolecules* **2019**, 52, 9105
